# Supplementary material for: Immunity against reinfection in pigs following Taenia solium infection and a quantitative dose-response model
Source: Research Square preprint supplement (doi:10.21203/rs.3.rs-6496988/v1), 2025-04-23

**Supplementary information**

**Fig S1** shows the outcomes of the model compared with observed data for pigs infected at 4 weeks of age with 100, 5,000 and 20,000 eggs. Please note that the confidence intervals are confidence intervals for the regression coefficient and not prediction intervals.


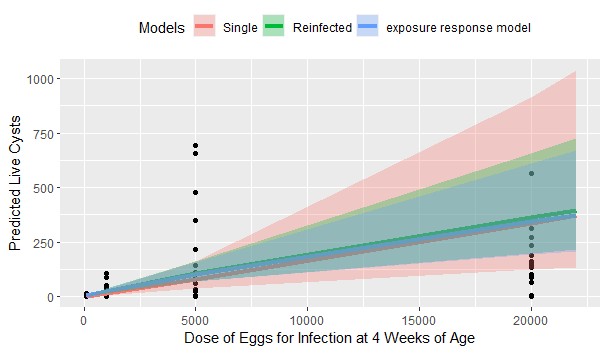


In **Fig S2**, data and predictions from our experiment are compared with data from an earlier systematic review of infection experiments used to feed into a model of the likelihood of infection for different doses (Andrade-Mogrovejo et al., 2022). There is reasonable agreement between our model and prior data. In the prior model, pigs infected with 100 eggs were estimated to have a [62-100%] probability of developing cysts, while in our dataset 11 out of 14 pigs (79%) receiving a first or single infective dose of 100 eggs developed cysts.


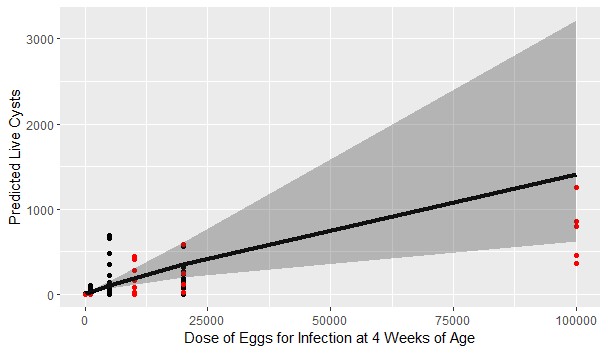

Supplement: Supplementary file 1 [file 3afdc00e6a6592f8a91ca5ec.docx]
